# Supplementary material
Source: Elsevier journal article supplement (https://www.sciencedirect.com/science/article/pii/S1138359322000260)
Supplement: mmc2 [file S1138359322000260:mmc2.pdf]

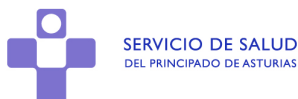

## **Consentimiento informado**

### **VALORACIÓN DEL IMPACTO DE UN SEGUIMIENTO SISTEMÁTICO A LOS PACIENTES CON UROLITIASIS EN ATENCIÓN PRIMARIA: UN ESTUDIO PILOTO**

#### **CONSENTIMIENTO INFORMADO POR ESCRITO PARA LA PARTICIPACIÓN EN UN ESTUDIO PILOTO:**

#### **VALORACIÓN DEL IMPACTO DE UN SEGUIMIENTO SISTEMÁTICO A LOS PACIENTES CON UROLITIASIS EN ATENCIÓN PRIMARIA: UN ESTUDIO PILOTO**

Nombre del paciente: \_\_\_\_\_

Nº Historia Clínica \_\_\_\_\_ Teléfono/s \_\_\_\_\_

Fecha de nacimiento: \_\_\_\_\_

Dirección del paciente: \_\_\_\_\_

La participación en el estudio ha sido propuesta por:

Dr. \_\_\_\_\_

- He leído detenidamente la información del paciente y me he tomado el tiempo necesario para considerar mi situación. Me han explicado la naturaleza, la finalidad, el periodo y los efectos predecibles del estudio y soy plenamente consciente de los posibles riesgos y la utilización del estudio, así como de otras posibilidades de tratamiento para mi condición.
- He recibido a título personal una copia de la información del paciente.
- He sido informado de que el diseño del estudio es conforme con los procedimientos rutinarios y la investigación estándar de un estudio clínico. Doy mi consentimiento para que se realicen las investigaciones necesarias, incluyendo una analítica de sangre y orina, una ecografía y una radiografía y un estudio de la litiasis así como una serie de preguntas sobre mi patología.
- Notificaré inmediatamente a mi médico todos los síntomas inesperados o inusuales experimentados durante el estudio. Soy plenamente consciente de que los datos incompletos o incorrectos representan un riesgo para mi salud. Por ello, cumpliré con las instrucciones que reciba durante todo el proceso del estudio y suministraré toda la información necesaria requerida por el médico.
- Entiendo que toda la información médica, incluyendo cuestionarios y datos electrónicos registrados, asociada a este estudio y relacionada con mi persona, será tratada y procesada de forma anónima, en cumplimiento con las leyes sobre la protección de datos.

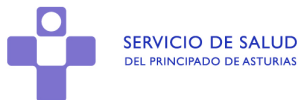

## **Consentimiento informado**

### **VALORACIÓN DEL IMPACTO DE UN SEGUIMIENTO SISTEMÁTICO A LOS PACIENTES CON UROLITIASIS EN ATENCIÓN PRIMARIA: UN ESTUDIO PILOTO**

- 
- Yo, por mi propia voluntad, deseo participar en este estudio clínico. Soy consciente de que en cualquier momento, sin más explicaciones y libremente, puedo dejar de participar en el estudio, siempre y cuando no se desarrollen desventajas para mi mismo a consecuencia de mi discontinuación.
  - He recibido información detallada, tanto verbal como escrita, referente a este estudio (objetivos, métodos, posibles riesgos y obligaciones). El investigador clínico arriba indicado me ha informado sobre las posibles complicaciones.

Confirmando que he entendido los objetivos, los métodos, el uso potencial y los posibles riesgos del estudio arriba mencionado.

Lugar/ Fecha: \_\_\_\_\_

Leído y aprobado: \_\_\_\_\_  
(Firma del paciente/ tutor)

Lugar/ Fecha: \_\_\_\_\_

Nombre del investigador clínico: \_\_\_\_\_  
(Firma del investigador clínico)
