# Supplementary material
Source: Elsevier journal article supplement (https://www.sciencedirect.com/science/article/pii/S1138359322000260)
Supplement: mmc3 [file S1138359322000260:mmc3.pdf]

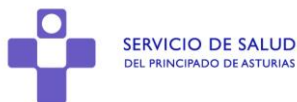

## Recomendaciones Dietéticas

### VALORACIÓN DEL IMPACTO DE UN SEGUIMIENTO SISTEMÁTICO A LOS PACIENTES CON UROLITIASIS EN ATENCIÓN PRIMARIA: UN ESTUDIO PILOTO

## RECOMENDACIONES DIETÉTICAS GENERALES

### LÍQUIDOS

**Se recomienda** la ingesta de alrededor de 2 litros al día o lo suficiente para mantener la orina clara (**ESTA ES LA MEDIDA MÁS IMPORTANTE**)

**Se desaconsejan** bebidas como la cerveza, café, té verde, refrescos y zumos industriales.

### NUTRICIONAL

Se recomienda dieta equilibrada y variada con las siguientes recomendaciones

#### Limitar la ingesta de sal

- El total que se use no debe superar una cucharilla de café rasa
- Evitar comida precocinada y comida rápida
- Usar como aderezo especias

#### Intentar reducir la ingesta de:

- Proteínas de origen animal (ricas en purinas): queso, carne roja y blanca, casquería, embutidos, pescado y marisco.
- Vegetales (ricos en oxalato): espinacas, berzas, espárragos, judías verdes, coliflor, guisantes.

**Asegurar una adecuada ingesta diaria de calcio** (1000 mg/día) que se cumpliría con alimentos como: un vaso de leche (500 mg), un yogur desnatado (250 mg), 50 g de queso fresco (500mg)

- Otros alimentos con calcio: almendras, legumbres, pescado azul

**Evitar suplementos vitamínicos** (vitaminas C y D)

### ESTILO DE VIDA:

El **sobrepeso** está directamente relacionado con la formación de cálculos renales y por lo tanto con la reproducción del cólico renal.

- Se recomienda reducir el peso corporal (IMC óptimo entre 18-25 kg/m<sup>2</sup>)

**Actividad física** regular de tipo aeróbico una vez pasado el episodio de dolor cólico renoureteral agudo, cuando el paciente ya no presente dolor.

- Caminar, bicicleta estática o elíptica.
